# Supplementary material
Source: Royal Society of Chemistry journal article supplement (doi:10.1039/d6dt00301j)
Supplement: d6dt00301j1.pdf [file d6dt00301j1.pdf]

1

## Supporting Information

2 Self-Purifying Chloride-Mediated Sequential  
3 Nitrate Reduction-Oxidation Enabled by a Co-  
4 Oxygen Vacancy Tandem Photoelectrocatalyst

5 *Yue He,<sup>a</sup> Hongbao Jia,<sup>c</sup> Ziyang Zhang,<sup>a</sup> Jiale Wang,<sup>a</sup> Xinyu Deng,<sup>a</sup> Jinghuan Peng,<sup>a</sup> Jue*  
6 *Wu,<sup>b</sup> Hui Xu,<sup>a</sup> Ding Wang,<sup>a</sup> Huan Shang,<sup>a\*</sup> Guisheng Li<sup>a</sup>*

7 <sup>a</sup>School of Materials and Chemistry, University of Shanghai for Science and  
8 Technology, Shanghai 200093, P. R. China.

9 <sup>b</sup>Department of Mathematics and Science, Fujian Jiangxia University, Fuzhou, 350108,  
10 China.

11 <sup>c</sup>School of Chemical Science and Engineering, Tongji University, Shanghai 200092,  
12 China.

13 \*Corresponding authors: huanshang1992@163.com.

- 14 **CONTENTS: 44 pages, 8 texts, 32 figures and 1 table**
- 15 **Texts**
- 16 Text S1. Physical characterizations.
- 17 Text S2. Photoelectrochemical measurements.
- 18 Text S3. In-situ IR measurements.
- 19 Text S4. In-situ Raman measurements.
- 20 Text S5. Differential electrochemical mass spectrometry (DEMS) measurements.
- 21 Text S6. Product analysis.
- 22 Text S7. Calculation of nitrate conversion and product selectivity.
- 23 Text S8. Theoretical simulations.
- 24 **Figures**
- 25 Figure S1. SEM images of (a) TP, (b) TiO<sub>2</sub>@TP.
- 26 Figure S2. SEM image of NTO@TP.
- 27 Figure S3. SEM image of Co-OV/TiO<sub>2</sub>@TP.
- 28 Figure S4. (a-c) TEM and (d) HRTEM images of NTO@TP.
- 29 Figure S5. TEM image of Co-OV/TiO<sub>2</sub>@TP.
- 30 Figure S6. (a) N<sub>2</sub> adsorption-desorption isotherms, (b) Corresponding pore size distribution  
31 curves.
- 32 Figure S7. XRD pattern of TP.
- 33 Figure S8. XPS survey analysis of Co-OV/TiO<sub>2</sub>@TP@TP, NTO@TP and TiO<sub>2</sub>@TP.
- 34 Figure S9. High-resolution XPS spectra of Na 1s of NTO@TP.
- 35 Figure S10. (a) UV-vis DRS spectra of Co-OV/TiO<sub>2</sub>@TP and NTO@TP.
- 36 Figure S11. Mott-Schottky plots of (a) NTO@TP and (b) Co-OV/TiO<sub>2</sub>@TP.

37 Figure S12. Corresponding plots of transformed Kubelka-Munk function versus photon energy  
38 of Co-OV/TiO<sub>2</sub>@TP and NTO@TP.

39 Figure S13. The schematic diagram of band structures of Co-OV/TiO<sub>2</sub>@TP and NTO@TP.

40 Figure S14. Transient photocurrent responses of Co-OV/TiO<sub>2</sub>@TP and NTO@TP. Figure S15.  
41 EIS of as-prepared Co-OV/TiO<sub>2</sub>@TP, NTO@TP and TiO<sub>2</sub>@TP.

42 Figure S16. (a) Room-temperature steady-state PL spectra, (b) The corresponding PL decay  
43 curves of Co-OV/TiO<sub>2</sub>@TP and NTO@TP.

44 Figure S17. (a) UV-vis absorption spectra of various concentration gradients of NO<sub>3</sub><sup>-</sup>-N. (b)  
45 The concentration-absorbance calibration curves of NO<sub>3</sub><sup>-</sup>-N.

46 Figure S18. (a) UV-vis absorption spectra of various concentration gradients of NO<sub>2</sub><sup>-</sup>-N. (b)  
47 The concentration-absorbance calibration curves of NO<sub>2</sub><sup>-</sup>-N.

48 Figure S19. (a) UV-vis absorption spectra of various concentration gradients of NH<sub>4</sub><sup>+</sup>-N. (b)  
49 The concentration-absorbance calibration curves of NH<sub>4</sub><sup>+</sup>-N.

50 Figure S20. At different potentials by Co-OV/TiO<sub>2</sub>@TP for 4h in 50 mg L<sup>-1</sup> NO<sub>3</sub><sup>-</sup>-N, 0.03 M  
51 KCl and 0.1 mol L<sup>-1</sup> K<sub>2</sub>SO<sub>4</sub> solution.

52 Figure S21. Photo-electrocatalytic NO<sub>3</sub><sup>-</sup>-N conversion and N<sub>2</sub> selectivity of Co-TiO<sub>2</sub>@TP.

53 Figure S22. Characterization and NO<sub>3</sub>RR performance of TiO<sub>2</sub>-OV/TP prepared by Ar  
54 calcination. (a) XRD pattern, (b) EPR spectrum, and (c) NO<sub>3</sub><sup>-</sup>-N conversion and N<sub>2</sub> selectivity.

55 Figure S23. CV curves at the scan rates changed from 20 to 100 mV s<sup>-1</sup>. Cyclic voltammetry  
56 curves of (a) Co-OV/TiO<sub>2</sub>@TP, (b) and NTO@TP (c) TiO<sub>2</sub>@TP electrodes. (d) Plots of half of  
57 the current density difference ( $\Delta j/2$ ) at the centered potential plotted against the scan rate. The  
58 slope of fitted straight line is the C<sub>dl</sub> value.

59 Figure S24. (a) Time-resolved concentration evolution of nitrogen species during the PEC  
60 NO<sub>3</sub>RR over Co-OV/TiO<sub>2</sub>@TP at 1.5 V vs.SCE in 0.1 mol L<sup>-1</sup> K<sub>2</sub>SO<sub>4</sub> and 0.03 M KCl solution  
61 with initial concentration of 50 mg L<sup>-1</sup> NO<sub>3</sub><sup>-</sup>-N. The dashed line indicates the WHO drinking

62 water standard for nitrate ( $10 \text{ mg L}^{-1} \text{ NO}_3^{-}\text{-N}$ ). (b) The changes in the concentrations of  
63 corresponding  $\text{NO}_2^{-}$  and  $\text{NH}_4^{+}$  during the reaction process.

64 Figure S25. (a) The performance of Co-OV/TiO<sub>2</sub>@TP under different initial concentration of  
65  $\text{NO}_3^{-}\text{-N}$ .

66 Figure S26. Effect of  $\text{Cl}^{-}$  concentration on the  $\text{NO}_3^{-}\text{-N}$  conversion and  $\text{N}_2$  selectivity of Co-  
67 OV/TiO<sub>2</sub>@TP under visible light irradiation at  $-1.5 \text{ V}$  (vs. SCE).

68 Figure S27. Time-dependent concentration changes of pH by Co-OV/TiO<sub>2</sub>@TP at  $1.5 \text{ V}$   
69 vs.SCE in  $0.1 \text{ mol L}^{-1} \text{ K}_2\text{SO}_4$  and  $0.03 \text{ M KCl}$  solution with initial concentration of  $50 \text{ mg L}^{-1}$   
70  $\text{NO}_3^{-}\text{-N}$ .

71 Figure S28. The catalytic performance of Co-OV/TiO<sub>2</sub>@TP under different initial  
72 concentration of (a)  $\text{PO}_4^{3-}$ , (b)  $\text{C}_2\text{O}_4^{2-}$ , (c)  $\text{S}_2\text{O}_8^{2-}$  and (d) a mixture of  $\text{C}_2\text{O}_4^{2-}$ ,  $\text{PO}_4^{3-}$  and  $\text{S}_2\text{O}_8^{2-}$ .

73 Figure S29. Co iron leaching amount of the Co-OV/TiO<sub>2</sub>@TP cathode during 26 repeated  
74 electrolysis tests (each test lasting 4 h).

75 Figure S30. SEM image of Co-OV/TiO<sub>2</sub>@TP after  $\text{NO}_3\text{RR}$ .

76 Figure S31. XRD patterns of Co-OV/TiO<sub>2</sub>@TP after  $\text{NO}_3\text{RR}$ .

77 Figure S32. CV curves of NTO@TP with different scan rates.

78 Figure S33. Electrochemical online DEMS results for the electrocatalytic  $\text{NO}_3\text{RR}$  over  
79 NTO@TP.

80 Figure S34. In situ Raman spectra of NTO@TP at different potentials.

81 Figure S35. In situ electrochemical FT-IR spectra of NTO@TP at different potential.

## 82 **Table**

83 Table S1. Comparison of NRR performances with reported catalysts.

84 **Text S1.** Physical characterizations.

85 The surface morphology and elemental distribution of electrocatalysts were  
86 observed using a field emission scanning electron microscope (SEM, ZEISS Merlin  
87 Compact; Jena; Germany) equipped with an energy dispersive spectrometer (EDS) and  
88 transmission electron microscope (TEM, JEOL JEM-2100; Tokyo; Japan) equipped  
89 with EDS. The TEM images were recorded on a Thermo Scientific Talos F200X  
90 microscope with an accelerating voltage of 200 kV. X-ray diffraction (XRD) for the  
91 crystalline phase was obtained with a Bruker D8 Advance operated at 40 kV and 30 Ma  
92 at a scanning rate of  $5^\circ \text{ min}^{-1}$ . Raman spectra were collected on a HORIBA Lab RAM  
93 HR Evolution with an Ar ion laser as an excitation source ( $\lambda = 532 \text{ nm}$ ). The Co content  
94 was analyzed by dissolving the samples in 2 mols/L  $\text{HNO}_3$  and measuring Co  
95 concentration resulting solution using inductive coupled plasma optical emission  
96 spectrometer (ICP OES, iCAP 7000 Series, Thermo Fisher iCAP PRO). The nitrogen  
97 adsorption-desorption isotherms were measured using a BET analyzer (Micromeritics  
98 ASAP 2460). Microstructure characteristics were obtained by transmission electron  
99 microscopy with a Hitachi H-7650. X-ray photoelectron spectroscopy (XPS, Thermo  
100 Scientific K-Alpha) with a monochromatized Al  $K\alpha$  line source (200W) was used to  
101 investigate the surface structure. UV-vis Diffuse Reflectance Spectra (UV-vis DRS,  
102 UV2600, Shimadzu, Japan) were used to analyze the adsorption properties of samples.  
103 Photoluminescence (PL) spectra were performed on the FLS1000 fluorescence  
104 spectrophotometer to probe the sample's optical properties. The detection of  $\text{Ov}$  and  $^*\text{H}$   
105 was conducted on an EPR spectroscope (Bruker EMX Nano, Germany). DMPO was  
106 applied as the spin-trapping agent of  $^*\text{H}$ . Samples were collected after 5 min  
107 photoelectrolysis at a current density of  $5 \text{ mA/cm}^2$ , mixed with DMPO and transferred  
108 into a quartz tube for EPR measurement.

109 **Text S2.** Photoelectrochemical measurements.

110 The photoelectrochemical test was performed by using a CHI 660D instrument  
111 (Shanghai CHI Instruments Co.) which is equipped with a standard three-electrode cell  
112 system (diaphragmless single-cell device). The counter electrode was a platinum plate,

113 the reference electrode was saturated glycogen electrode (SCE), and the working  
114 electrode was as-prepared Co-OV/TiO<sub>2</sub>@TP photoelectrode (the geometric area: 2 cm  
115 × 2 cm). 0.1 M K<sub>2</sub>SO<sub>4</sub> and 0.03 M KCl was used as the electrolyte. To simulate sunlight  
116 (100 mW·cm<sup>-2</sup>), the solar simulator was employed (AM 1.5 G, ABET  
117 TECHNOLOGIES). The single-cell were filled with 70 ml solution (0.1 M K<sub>2</sub>SO<sub>4</sub> +  
118 0.03 M KCl +50 mg L<sup>-1</sup> NO<sub>3</sub><sup>-</sup>-N) and then degassed by Ar (99.999%) for more than 30  
119 mins. Linear sweep voltammetry (LSV) was recorded at a scan rate of 5 mV/s for the  
120 NO<sub>3</sub>RR process. Electrochemical impedance spectroscopy (EIS) measurements were  
121 performed in the range from 100 kHz to 0.01 Hz with a perturbation of 5 mV amplitude.  
122 To estimate the C<sub>dl</sub>, cyclic voltammetry (CV) was carried out in the non-Faradaic  
123 potential region from -0.21 to -0.09 V vs. SCE with various scan rates, and then the  
124 capacitive current  $\Delta j = (j_a - j_c)/2$  at -0.15 V was plotted versus the scan rate.  
125 Chronoamperometry (i-t) tests were performed to measure the current response at a  
126 constant potential. The photoelectrocatalytic activity of NO<sub>3</sub>RR at Co-OV/TiO<sub>2</sub>@TP  
127 cathode was evaluated under different conditions, such as electrocatalytic applied  
128 potentials ( -1.2, -1.3, -1.4, 1.5 and -1.6 V vs. SCE), electrolyte type, (K<sub>2</sub>SO<sub>4</sub> and KCl)  
129 solution pH (3.0, 5.0, 7.0, 9.0, 11.0), and NO<sub>3</sub><sup>-</sup>-N concentration (10, 20, 50 and 100 mg  
130 L<sup>-1</sup>), and the pH of the solution was adjusted using hydrochloric acid and potassium  
131 hydroxide.

132 **Text S3.** In-situ IR measurements.

133 In-situ FTIR spectra were collected on an iS50 FTIR spectrometer with substrate  
134 monocrystallinesilicon ingot. 2.0 mg of Co-OV/TiO<sub>2</sub>@TP catalyst and 10 μL of Nafion  
135 solution were added to 200 μL of ethanol and 400 μL of deionized water, and then  
136 ultrasonicated for 1 hour to obtain a uniform ink. 600 μL of the ink was carefully  
137 dropped onto a carbon paper as the working electrode. The copper wire and the  
138 saturated calomel electrode were used as the counter electrode and the reference  
139 electrode respectively. Then, 0.1 M K<sub>2</sub>SO<sub>4</sub> solution and 0.03 M KCl and 50 ppm NO<sub>3</sub><sup>-</sup>  
140 -N were used as the electrolytes. Before measurement, the background spectrum of the  
141 working electrode at open-circuit voltage was recorded. At a voltage of -0.8 V vs SCE,

142 in-situ Fourier Transform Infrared Spectroscopy was continuously measured every 100  
143 seconds.

144 **Text S4.** In-situ Raman measurements.

145 The measurements were performed on a HORIBA Lab RAM HR Evolution  
146 coupled with a CHI 660 electrochemical workstation. A Co-OV/TiO<sub>2</sub>@TP electrode  
147 coated with catalyst powder served as the working electrode during the experiments.  
148 This electrode was immersed into the electrolyte via the cell wall, ensuring the electrode  
149 surface remained perpendicular to the laser beam. A copper wire and an Ag/AgCl  
150 electrode were employed as the counter electrode and reference electrode, respectively.  
151 The electrochemical environment consisted of electrolyte containing 50 mg L<sup>-1</sup> NO<sub>3</sub><sup>-</sup>-  
152 N, 0.1 mol/L K<sub>2</sub>SO<sub>4</sub>, and 0.03 mol/L KCl. Chronoamperometry (i-t) tests were  
153 conducted at each fixed potential for 300 seconds.

154 **Text S5.** Differential electrochemical mass spectrometry (DEMS) measurements.

155 0.1 M K<sub>2</sub>SO<sub>4</sub> and 0.03 M KCl electrolyte solution containing 50 ppm NO<sub>3</sub><sup>-</sup>-N was  
156 continuously pumped into a custom-designed electrochemical cell using a peristaltic  
157 pump. Before and during DEMS measurements, Ar (99.999%) was continuously  
158 purged through the electrolyte. Potential sweeps from 0 V to -2.0 V (vs.SCE) were  
159 performed at 10 mV/s until baseline stabilization was achieved, with simultaneous  
160 recording of corresponding mass spectrometry signals. Three consecutive runs were  
161 conducted under identical conditions to minimize random errors in DEMS  
162 measurements, concluding the experimental procedure after the three cycles.

163 **Text S6.** Product analysis.

164 Determination of nitrate-N (NO<sub>3</sub><sup>-</sup>-N):The electrolyte solution was collected and  
165 filtered through a 22 μm aqueous-phase membrane, then quantitatively diluted to 5 mL  
166 with deionized water (within the detection range). Subsequently, 200 μL of 1 M HCl  
167 and 20 μL of sulfamic acid solution (0.8% w/v) were sequentially added to the diluted  
168 solution. After standing for 5 minutes, the UV-Vis absorption spectrum was measured,  
169 and the absorption intensities at 220 nm and 275 nm were recorded. The concentration  
170 of NO<sub>3</sub><sup>-</sup>-N was calculated by the absorbance value A ( $A=A_{220\text{ nm}}-2A_{275\text{ nm}}$ ). A

171 calibration curve relating absorbance to concentration was established using standard  
172 potassium nitrate solutions (Figure S17 in Supporting Information), and the potassium  
173 nitrate crystal was dried at 105-110 °C for 2 h in advance.

174 Determination of nitrite-N ( $\text{NO}_2^-$ -N): A color reagent was prepared by mixing 4 g  
175 of p-aminobenzenesulfonamide, 0.2 g of N-(1-Naphthyl) ethylenediamine  
176 dihydrochloride, 50 mL of ultrapure water, and 10 mL of phosphoric acid ( $\rho = 1.70$   
177 g/mL), followed by dilution to a final volume of 100 mL. An aliquot of the electrolyte  
178 solution was collected, filtered through a 0.22  $\mu\text{m}$  aqueous-phase membrane, and  
179 quantitatively diluted to 5 mL with deionized water (within the detection range).  
180 Subsequently, 0.1 mL of the color reagent was added to the diluted solution, mixed  
181 thoroughly, and allowed to stand for 20 min. The absorption intensity at 540 nm was  
182 recorded. A concentration-absorbance calibration curve was established using a series  
183 of standard sodium nitrite solutions (Fig. S18 in Supporting Information).

184 Determination of  $\text{NH}_4^+$ -N: Ammonia-N was determined using Nessler's reagent  
185 as the color agent. An aliquot of the electrolyte solution was filtered through a 0.22  $\mu\text{m}$   
186 aqueous-phase membrane filter and quantitatively diluted to 5 mL with deionized water  
187 (within the detection range). Subsequently, 0.1 mL of potassium sodium tartrate  
188 solution and 0.1 mL of Nessler's reagent were sequentially added to the diluted  
189 solution. After thorough mixing and standing for 15 min, the UV-Vis absorption  
190 spectrum was measured, and the absorption intensity at 420 nm was recorded. A  
191 concentration-absorbance calibration curve was established using a series of standard  
192 ammonium chloride solutions and the ammonium chloride crystal was dried at 100°C  
193 for 2 h in advance (Fig. S19 in Supporting information). The potassium sodium tartrate  
194 solution was prepared by dissolving 50 g of potassium sodium tartrate tetrahydrate  
195 ( $\text{KNaC}_4\text{H}_4\text{O}_6 \cdot 4\text{H}_2\text{O}$ ) in 100 mL of ultrapure water, heated to boiling to remove residual  
196 ammonium ions, cooled to room temperature, and diluted to a final volume of 100 mL.  
197 **Text S7.** Calculation of nitrate conversion and product selectivity.  
198 The conversion of  $\text{NO}_3^-$  was calculated:

199 
$$C(\text{NO}_3^-)\% = \frac{C_0(\text{NO}_3^- - N) - C_t(\text{NO}_3^- - N)}{C_0(\text{NO}_3^- - N)} \times 100\%$$

200 The selectivity of the product was calculated:

201 
$$S(\text{N}_2)\% = \frac{C_0(\text{NO}_3^- - N) - C_t(\text{NO}_2^- - N) - C_t(\text{NH}_4^+ - N)}{\Delta C(\text{NO}_3^- - N)} \times 100\%$$

202 Where  $C_0$  ( $\text{NO}_3^-$ ) ( $\text{mg L}^{-1}$ ) and  $C_t$  ( $\text{NO}_3^-$ ) ( $\text{mg L}^{-1}$ ) are the initial nitrate ( $\text{NO}_3^-$ -N)  
 203 concentration and nitrate concentration after different electrocatalytic reduction time,  
 204 respectively.  $C_t$  ( $\text{NO}_2^-$ -N) and  $C_t$  ( $\text{NH}_4^+$ -N) represent the concentrations of nitrite and  
 205 ammoniums.

206 **Text S8.** Theoretical simulations.

207 The spin-polarized density functional theory (DFT) calculations were obtained by  
 208 the Vienna Ab initio Simulation Package where the implemented projector augmented  
 209 wave method was used to describe the wave function.<sup>1-3</sup> The Perdew-Burke-Ernzerhof  
 210 density function with generalized gradient approximation was employed for the  
 211 exchange-correlation energy,<sup>4</sup> in which the Hubbard U correction was 6 eV for 3d  
 212 electrons of Ti atoms for the total relaxation and the plane wave cutoff was 400 eV.  
 213 The Brillouin-zone integrations were approximated by using the Monkhorst-Pack  
 214 scheme.<sup>5</sup> The wave function optimization was terminated when energy change was  
 215 converged to  $10^{-5}$  eV and corresponding ionic relaxation loop to  $0.02 \text{ eV \AA}^{-1}$ . The  $\text{TiO}_2$   
 216 (101) surface models with Fe single-atom were adopted to simulate  $\text{O}_2/\text{NO}$  adsorption  
 217 with the periodic vacuum of  $20 \text{ \AA}$ .

218

219

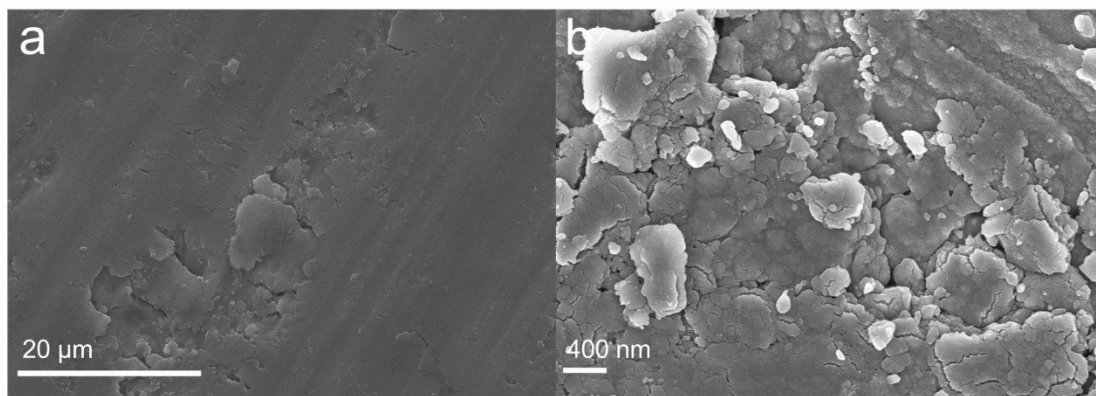

220

221 **Figure S1.** SEM images of (a) TP, (b)  $\text{TiO}_2@$ TP.

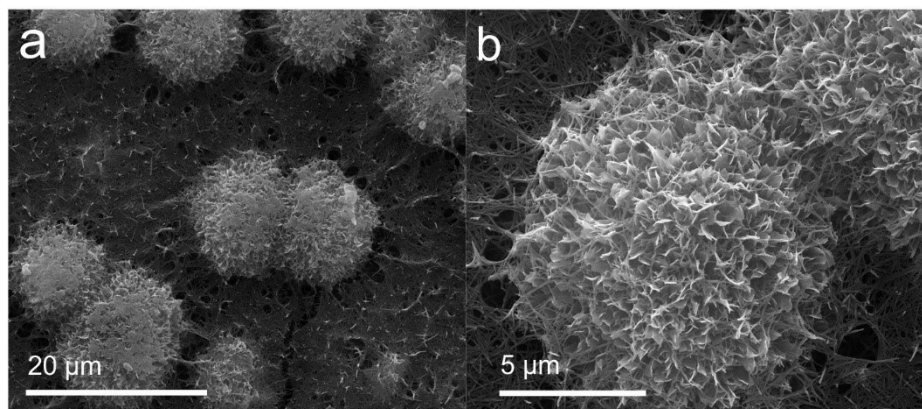

222

223 **Figure S2.** SEM image of NTO@TP at (a) 20 μm and (b) 5 μm.

224

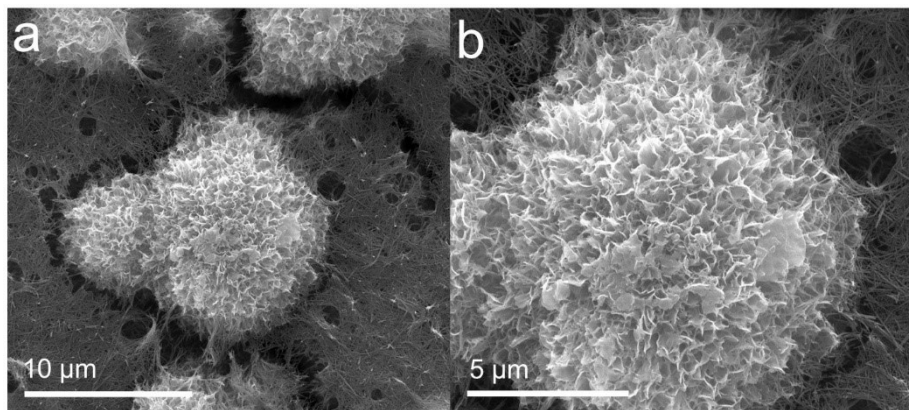

225

226 **Figure S3.** SEM image of Co-OV/TiO<sub>2</sub>@TP at (a) 10 um and (b) 5 um.

227

228

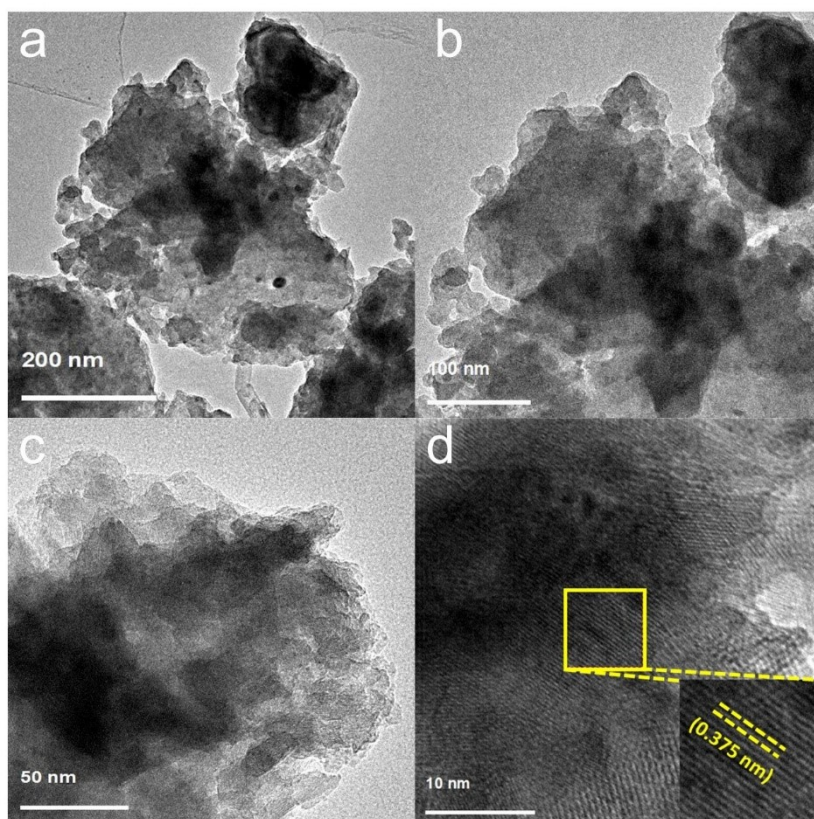

229

230 **Figure S4.** (a-c) TEM and (d) HRTEM images of NTO@TP.

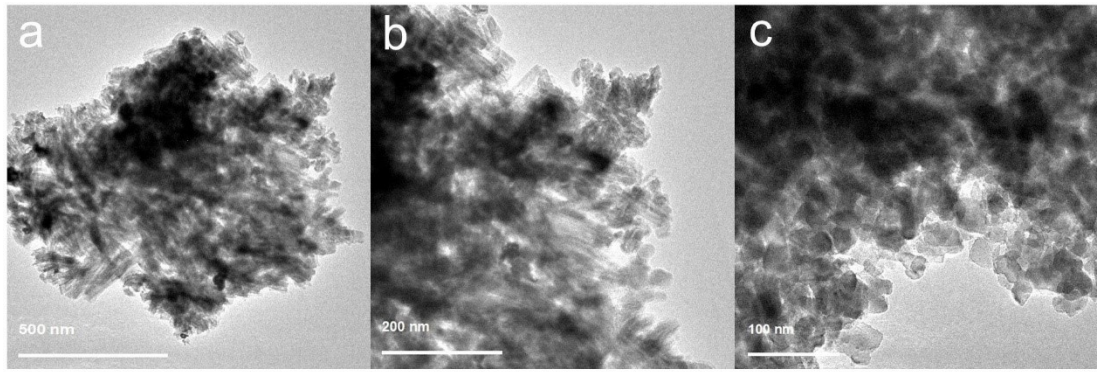

231

232 **Figure S5.** TEM image of Co-OV/TiO<sub>2</sub>@TP at (a) 500 nm, (b) 200 nm, and 100 nm.

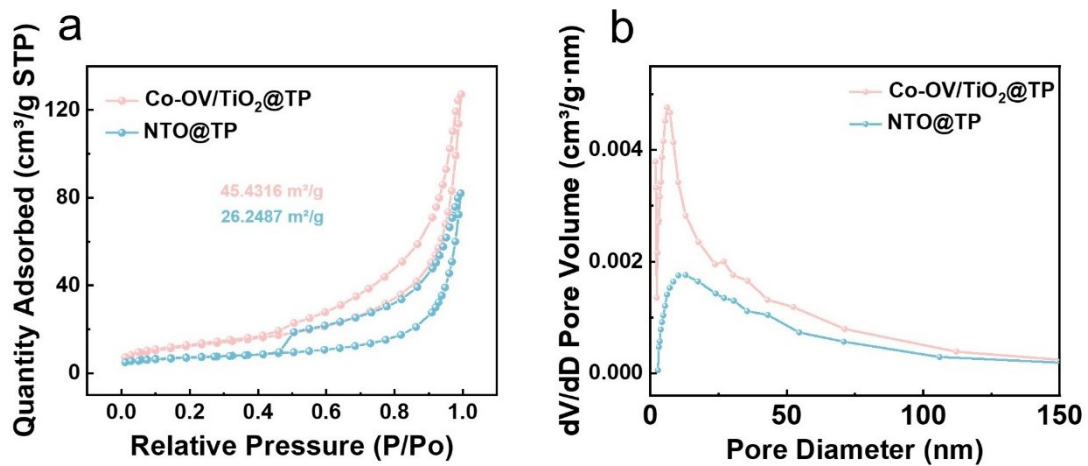

233

234 **Figure S6.** (a) N<sub>2</sub> adsorption-desorption isotherms, (b) Corresponding pore size distribution  
 235 curves.

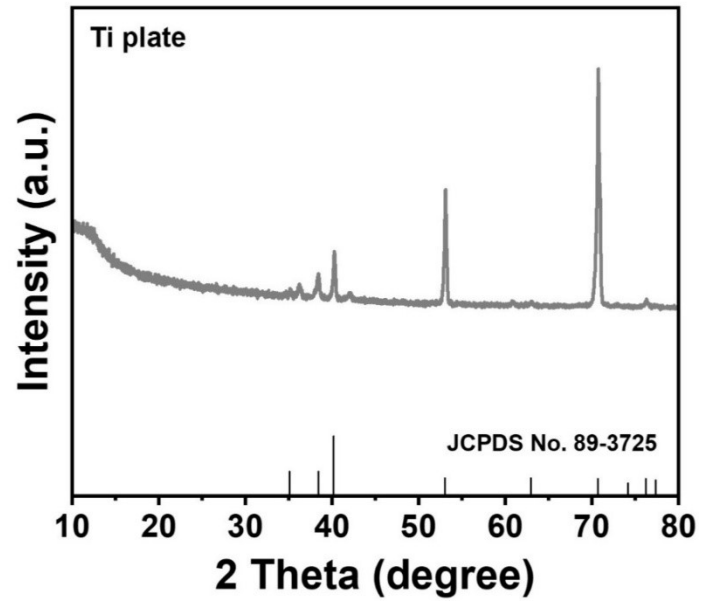

236

237 **Figure S7.** XRD pattern of TP.

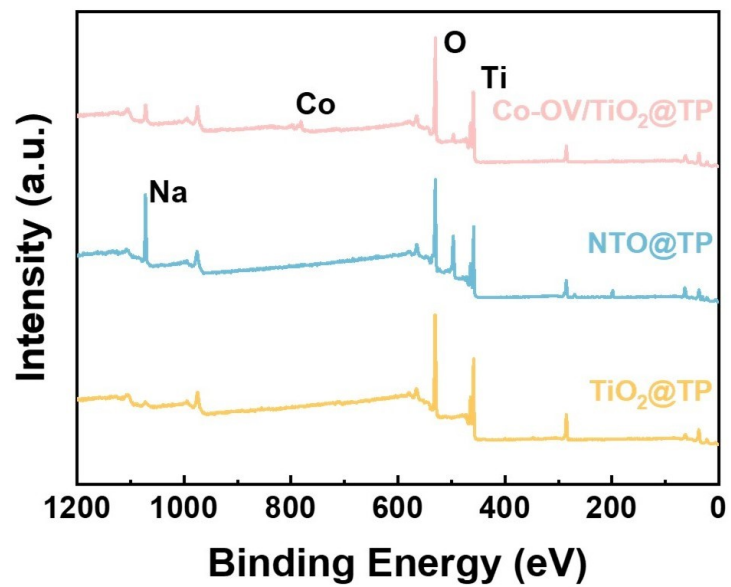

238

239 **Figure S8.** XPS survey analysis of Co-OV/TiO<sub>2</sub>@TP@TP, NTO@TP and TiO<sub>2</sub>@TP.

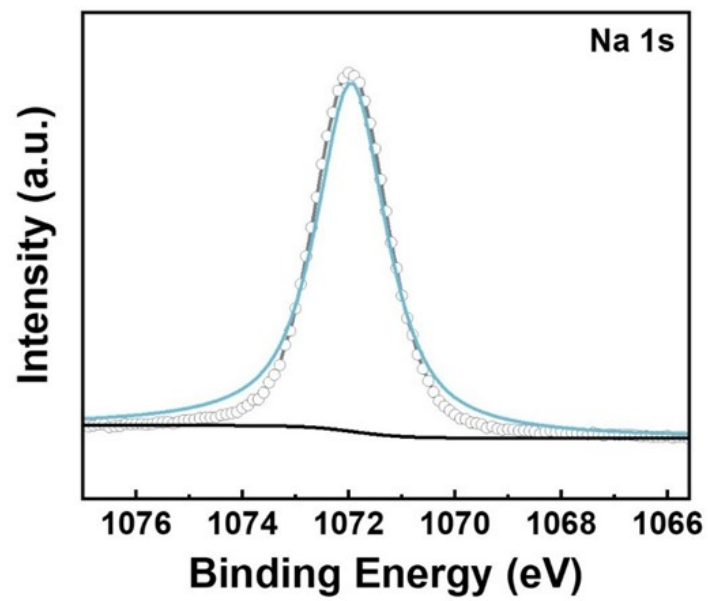

240

241 **Figure S9.** High-resolution XPS spectra of Na 1s of NTO@TP.

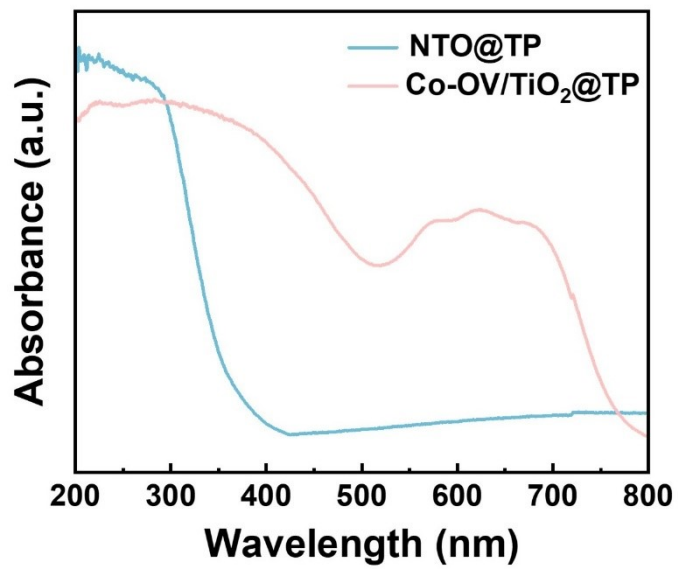

242

243 **Figure S10.** (a) UV-vis DRS spectra of Co-OV/TiO<sub>2</sub>@TP and NTO@TP.

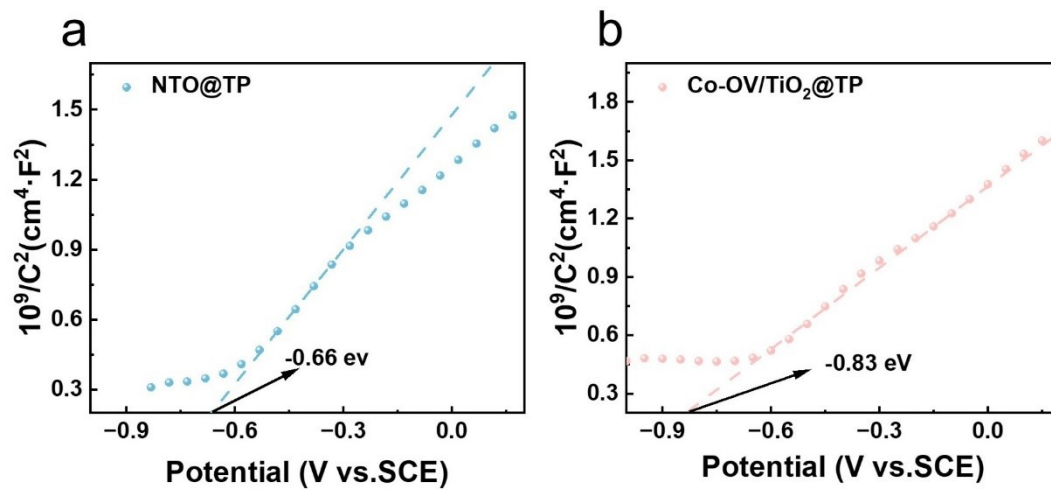

244

245 **Figure S11.** Mott-Schottky plots of (a) NTO@TP and (b) Co-OV/TiO<sub>2</sub>@TP.

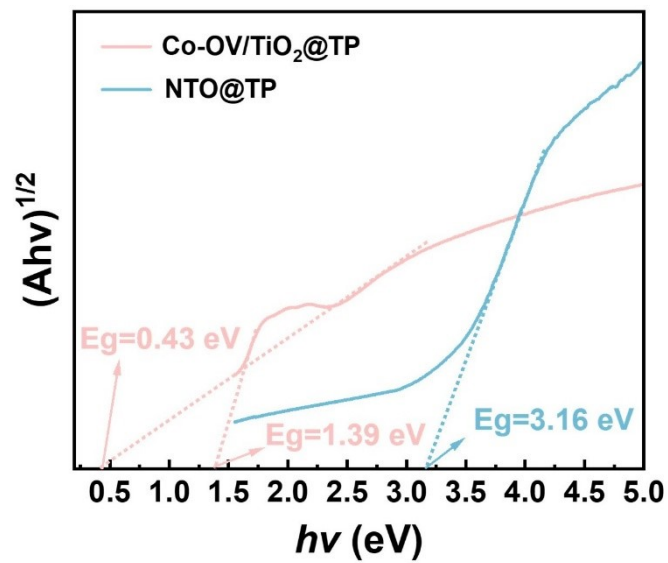

246

247 **Figure S12.** Corresponding plots of transformed Kubelka-Munk function versus photon energy  
 248 of Co-OV/TiO<sub>2</sub>@TP and NTO@TP.

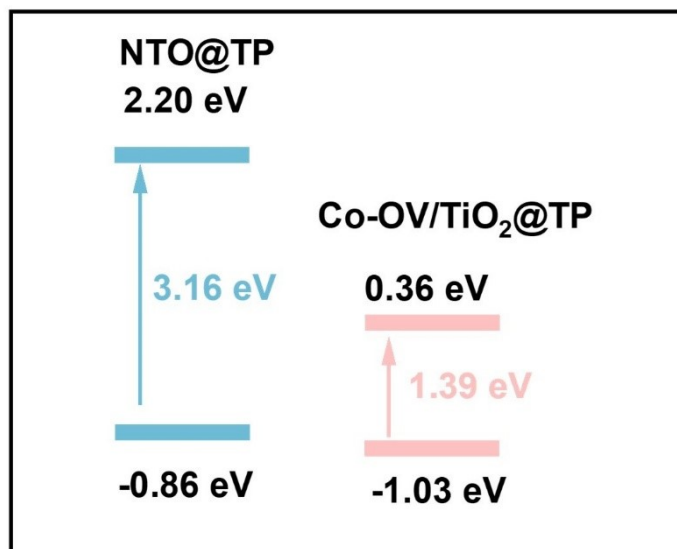

249

250 **Figure S13.** The schematic diagram of band structures of Co-OV/TiO<sub>2</sub>@TP and NTO@TP.

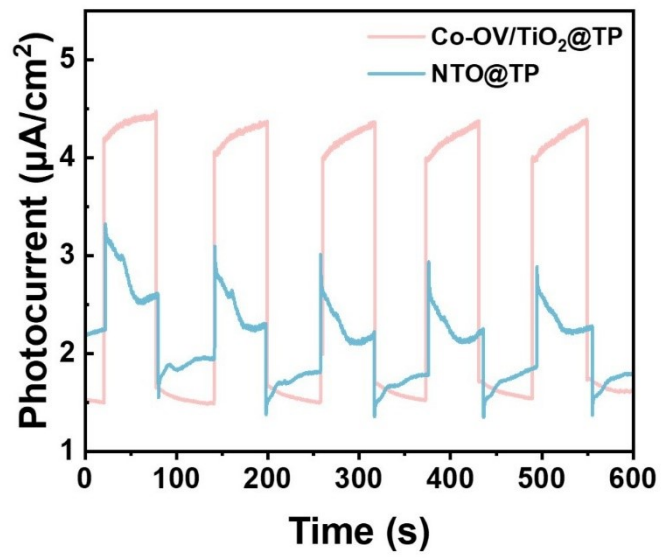

251

252 **Figure S14.** Transient photocurrent responses of Co-OV/ $\text{TiO}_2$ @TP and NTO@TP.

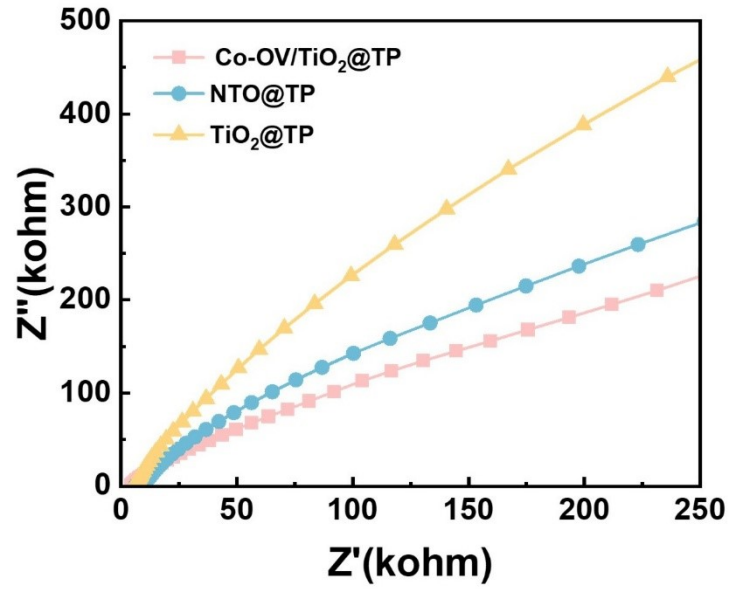

253

254 **Figure S15.** EIS of as-prepared  $\text{Co-OV/TiO}_2\text{@TP}$ ,  $\text{NTO@TP}$  and  $\text{TiO}_2\text{@TP}$ .

255

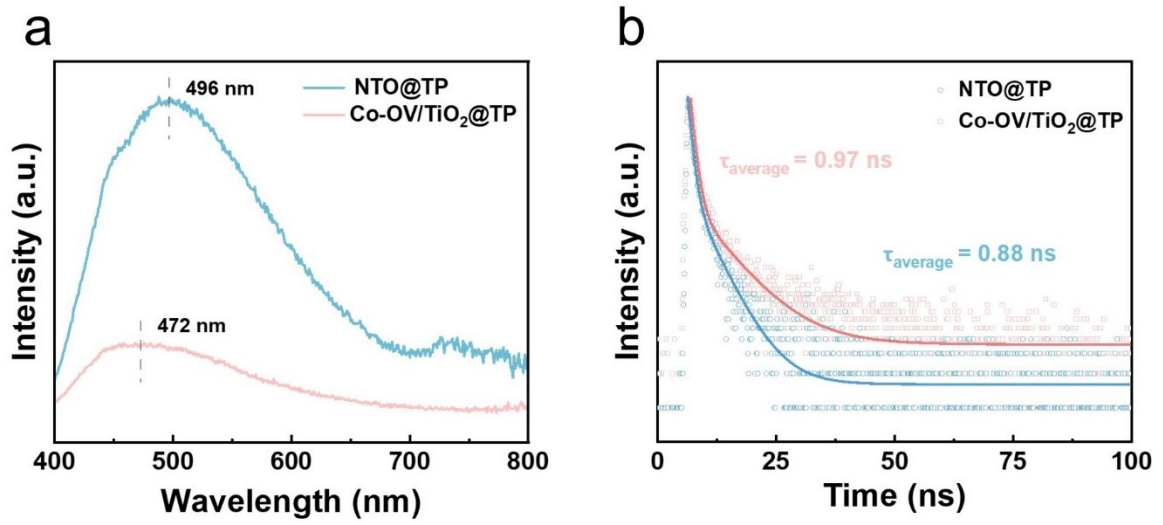

256

257 **Figure S16.** (a) Room-temperature steady-state PL spectra, (b) The corresponding PL decay  
258 curves of Co-OV/TiO<sub>2</sub>@TP and NTO@TP.

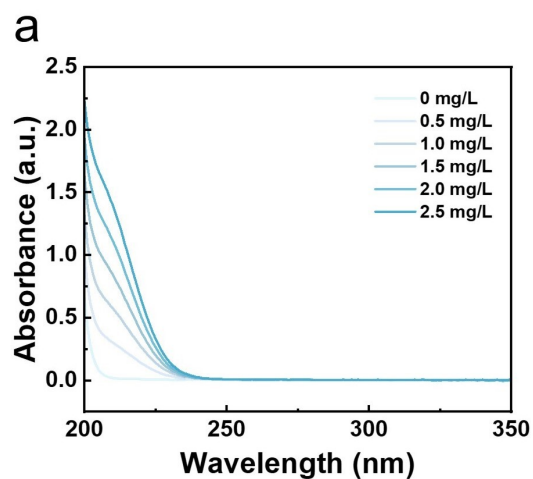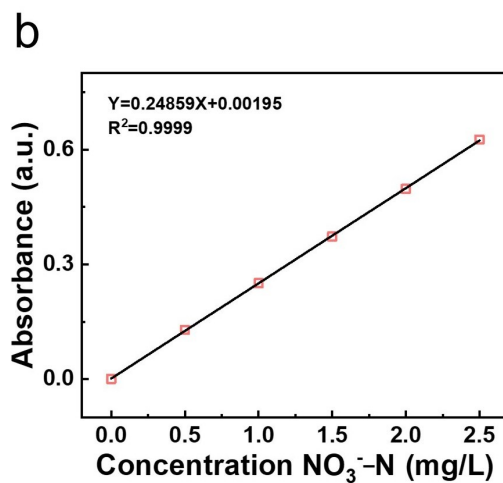

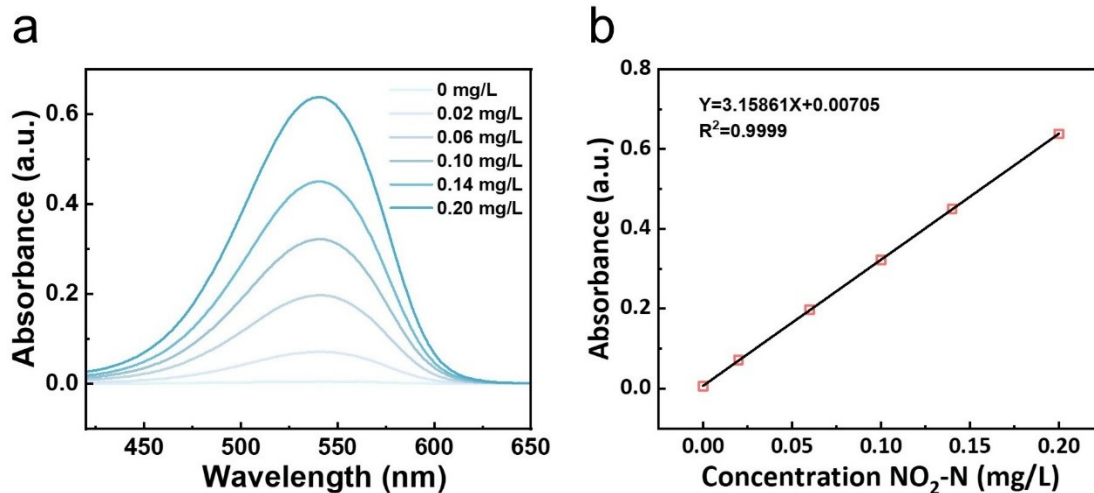

262

263 **Figure S18.** (a) UV-vis absorption spectra of various concentration gradients of  $\text{NO}_2^-$ -N. (b)  
 264 The concentration-absorbance calibration curves of  $\text{NO}_2^-$ -N.

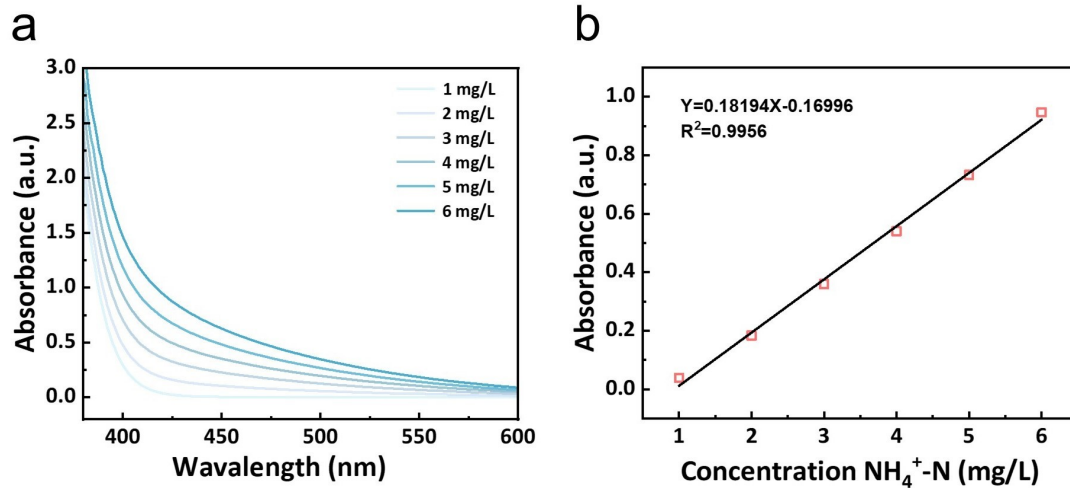

265

266 **Figure S19.** (a) UV-vis absorption spectra of various concentration gradients of  $\text{NH}_4^+\text{-N}$ . (b)

267 The concentration-absorbance calibration curves of  $\text{NH}_4^+\text{-N}$ .

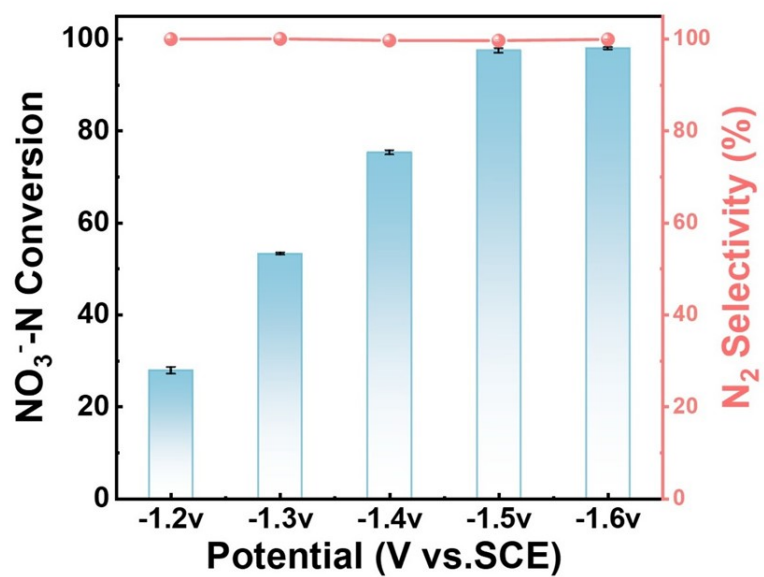

268

269 **Figure S20.** At different potentials by Co-OV/TiO<sub>2</sub>@TP for 4h in 50 mg L<sup>-1</sup> NO<sub>3</sub><sup>-</sup>-N, 0.03 M  
 270 KCl and 0.1 mol L<sup>-1</sup> K<sub>2</sub>SO<sub>4</sub> solution.

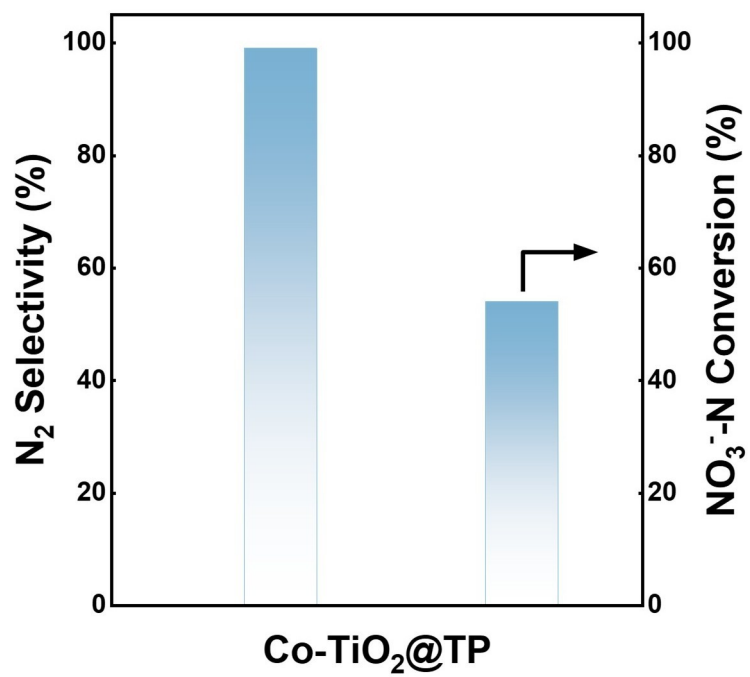

271

272 **Figure S21.** Photo-electrocatalytic NO<sub>3</sub><sup>-</sup>-N conversion and N<sub>2</sub> selectivity of Co-TiO<sub>2</sub>@TP.

273

274

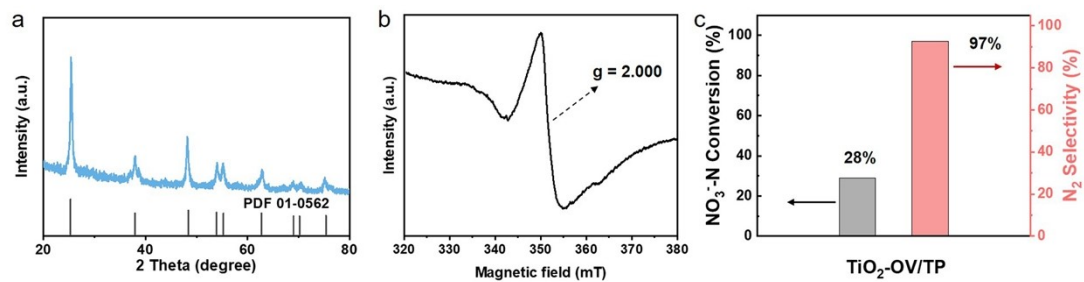

275

276 **Figure S22.** Characterization and NO<sub>3</sub>RR performance of TiO<sub>2</sub>-OV/TP prepared by Ar  
 277 calcination. (a) XRD pattern, (b) EPR spectrum, and (c) NO<sub>3</sub><sup>-</sup>-N conversion and N<sub>2</sub> selectivity.

278

279

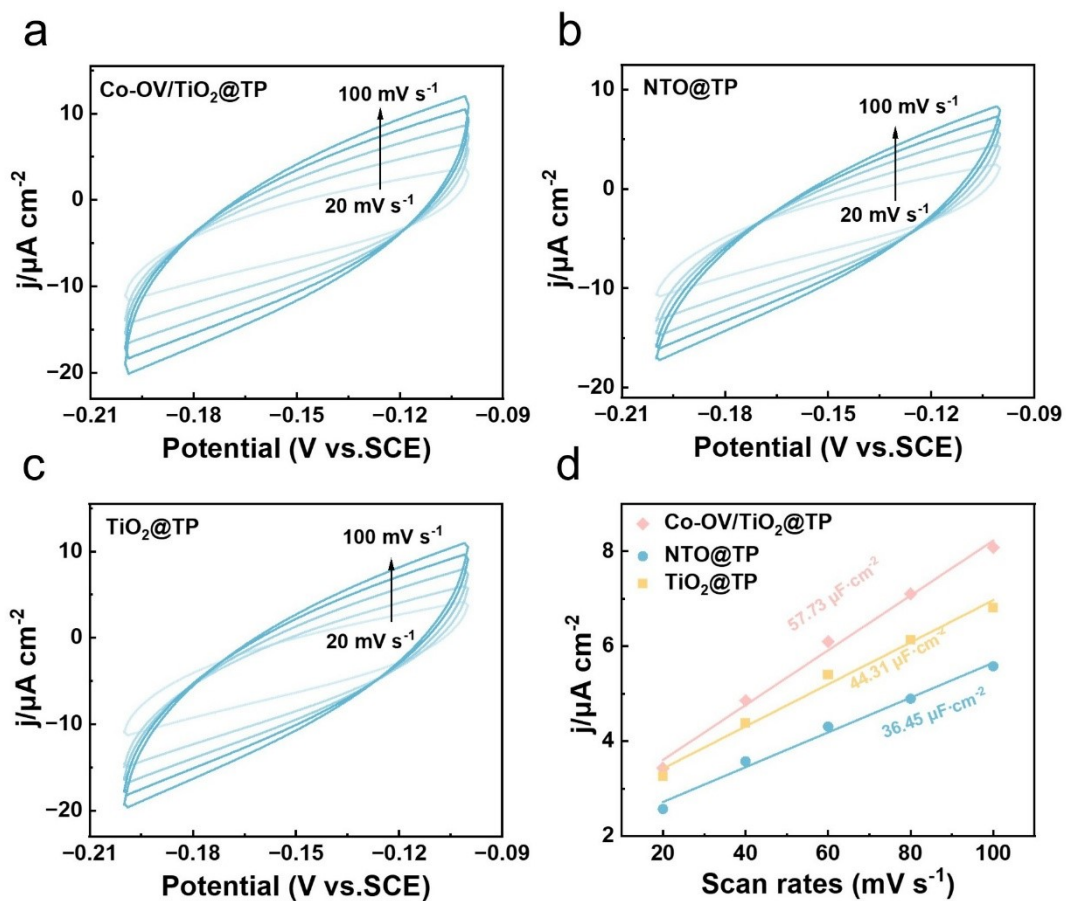

280

281 **Figure S23.** CV curves at the scan rates changed from 20 to 100  $\text{mV s}^{-1}$ . Cyclic voltammetry  
 282 curves of (a) Co-OV/TiO<sub>2</sub>@TP, (b) and NTO@TP (c) TiO<sub>2</sub>@TP electrodes. (d) Plots of half of  
 283 the current density difference ( $\Delta j/2$ ) at the centered potential plotted against the scan rate. The  
 284 slope of fitted straight line is the  $C_{dl}$  value.

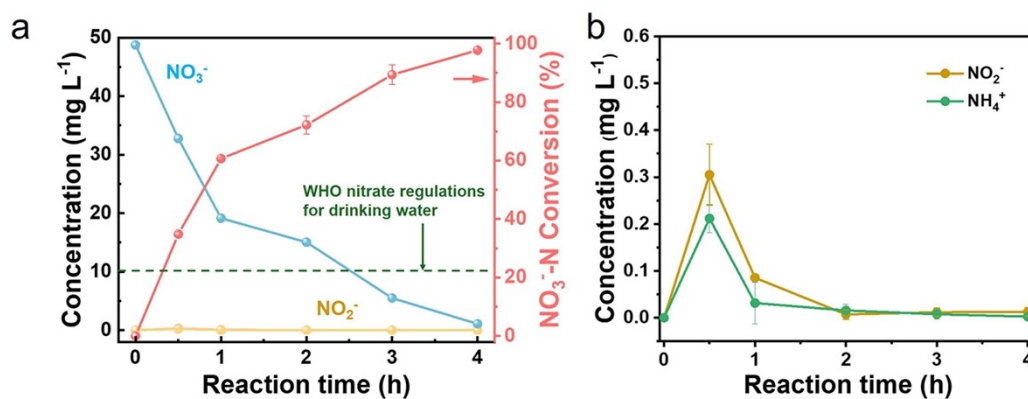

285

286 **Figure S24.** (a) Time-resolved concentration evolution of nitrogen species during the PEC  
 287  $\text{NO}_3\text{RR}$  over  $\text{Co-OV}/\text{TiO}_2@\text{TP}$  at 1.5 V vs.SCE in 0.1 mol  $\text{L}^{-1}$   $\text{K}_2\text{SO}_4$  and 0.03 M KCl solution  
 288 with initial concentration of 50  $\text{mg L}^{-1}$   $\text{NO}_3^-$ -N. The dashed line indicates the WHO drinking  
 289 water standard for nitrate (10  $\text{mg L}^{-1}$   $\text{NO}_3^-$ -N). (b) The changes in the concentrations of  
 290 corresponding  $\text{NO}_2^-$  and  $\text{NH}_4^+$  during the reaction process.

291 As shown in Figure S24a, the  $\text{NO}_3^-$ -N concentration decreased steadily from 48.8  $\text{mg L}^{-1}$  to 1.1  
 292  $\text{mg L}^{-1}$  over 4 hours, corresponding to a conversion of ~98%. Meanwhile,  $\text{NO}_2^-$ -N and  $\text{NH}_4^+$ -N  
 293 were identified as transient intermediates (Figure S24b), reaching maximum concentrations of  
 294 only ~0.3  $\text{mg L}^{-1}$  and ~0.2  $\text{mg L}^{-1}$ , respectively, at 0.5 h, and subsequently decaying rapidly to  
 295 near-zero levels (<0.1  $\text{mg L}^{-1}$ ) by the end of the reaction. The residual  $\text{NO}_2^-$ -N and  $\text{NH}_4^+$ -N at  
 296 the reaction endpoint are both below the detection limit, and the nitrogen deficit (~98% of the  
 297 initial N) can be confidently attributed to  $\text{N}_2$  generation.

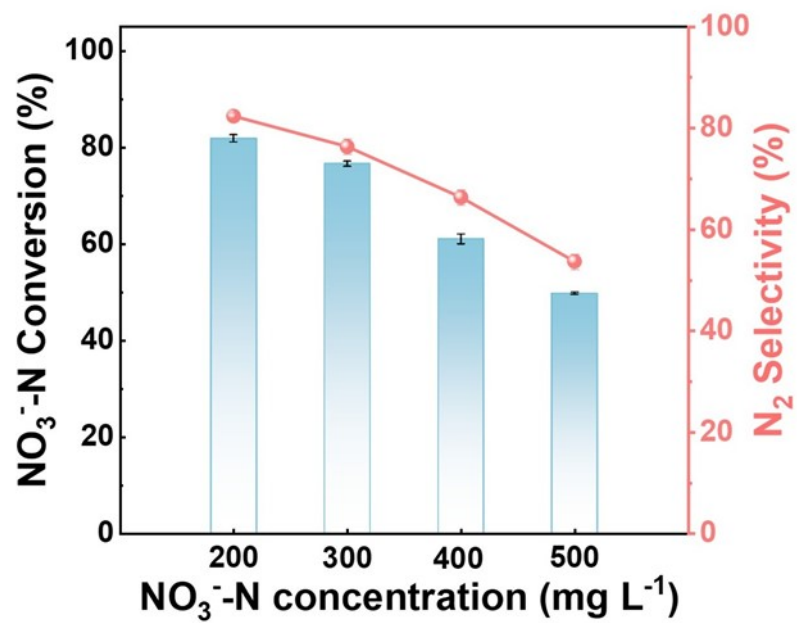

299

300 **Figure S25.** (a) The performance of Co-OV/TiO<sub>2</sub>@TP under different initial concentration of  
301  $\text{NO}_3^-$ -N.

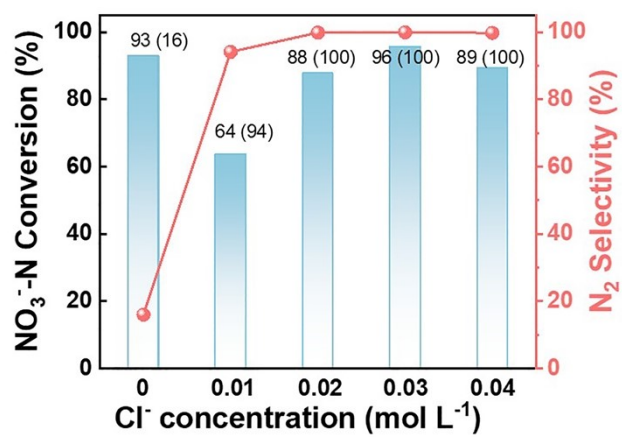

302

303 **Figure S26.** Effect of Cl<sup>-</sup> concentration on the NO<sub>3</sub><sup>-</sup>-N conversion and N<sub>2</sub> selectivity of Co-  
 304 OV/TiO<sub>2</sub>@TP under visible light irradiation at -1.5 V (vs. SCE).

305

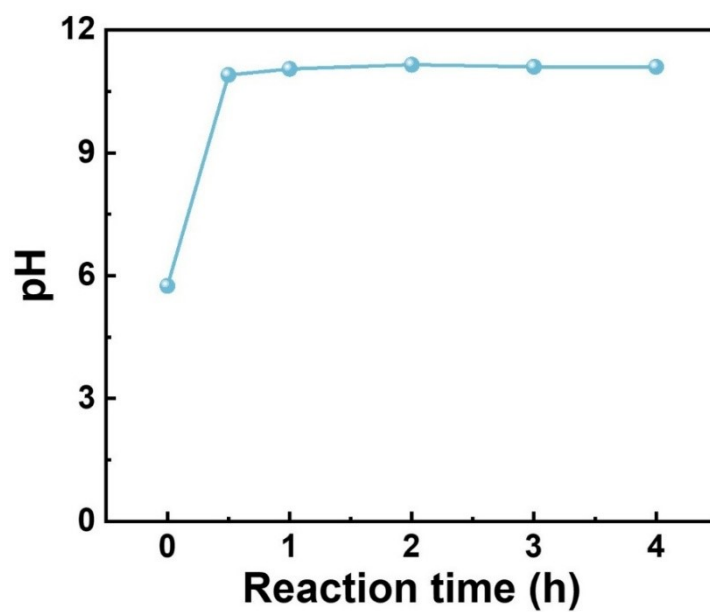

306

307 **Figure S27.** Time-dependent concentration changes of pH by Co-OV/TiO<sub>2</sub>@TP at 1.5 V  
308 vs.SCE in 0.1 mol L<sup>-1</sup> K<sub>2</sub>SO<sub>4</sub> and 0.03 M KCl solution with initial concentration of 50 mg L<sup>-1</sup>  
309 NO<sub>3</sub><sup>-</sup>-N.

310

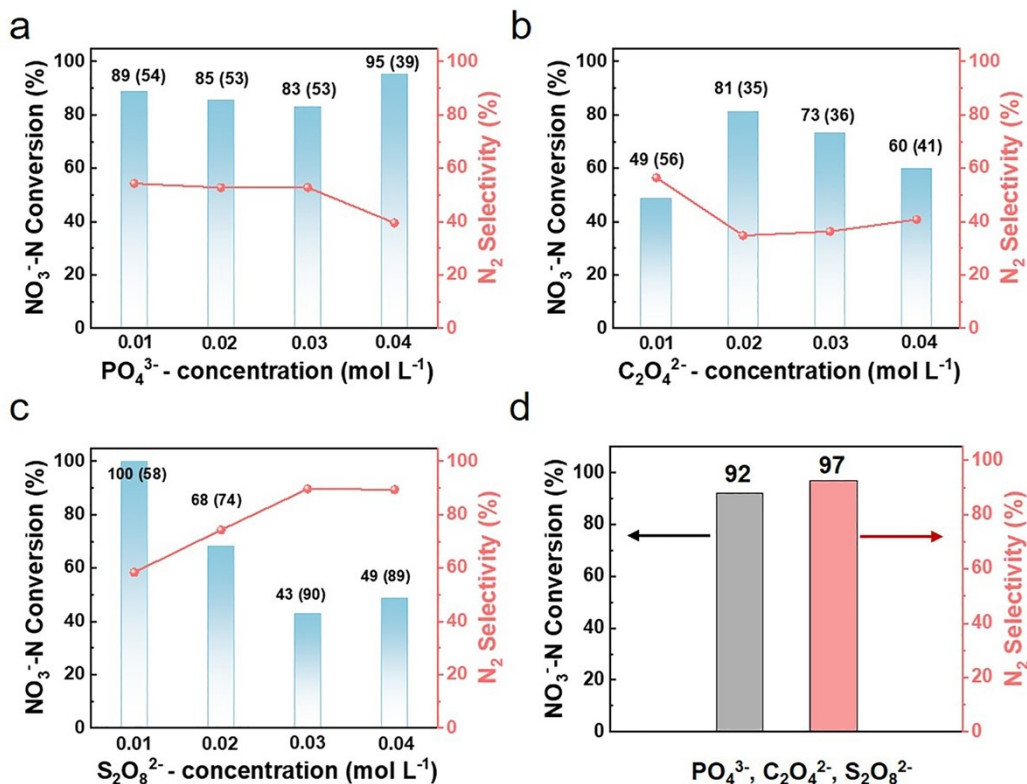

311

312 **Figure S28.** The catalytic performance of Co-OV/TiO<sub>2</sub>@TP under different initial  
 313 concentration of (a) PO<sub>4</sub><sup>3-</sup>, (b) C<sub>2</sub>O<sub>4</sub><sup>2-</sup>, (c) S<sub>2</sub>O<sub>8</sub><sup>2-</sup> and (d) a mixture of C<sub>2</sub>O<sub>4</sub><sup>2-</sup>, PO<sub>4</sub><sup>3-</sup> and S<sub>2</sub>O<sub>8</sub><sup>2-</sup>.

314 The three anions show distinctly different effects on Co-OV/TiO<sub>2</sub>@TP. PO<sub>4</sub><sup>3-</sup> exhibits the  
 315 mildest influence, with the NO<sub>3</sub><sup>-</sup>-N removal maintained at 83-95% across all tested  
 316 concentrations. C<sub>2</sub>O<sub>4</sub><sup>2-</sup> shows a certain inhibitory effect with NO<sub>3</sub><sup>-</sup>-N removal of 49-81%, likely  
 317 due to competitive adsorption at active sites. S<sub>2</sub>O<sub>8</sub><sup>2-</sup> displays a concentration-dependent  
 318 behavior, favoring NO<sub>3</sub><sup>-</sup>-N conversion at low concentrations and enhancing N<sub>2</sub> selectivity at  
 319 higher concentrations, reflecting its dual role in modulating both reduction and oxidation half-  
 320 reactions. These results confirm that the concentrations of coexisting anions indeed affect the  
 321 catalytic performance. More importantly, under a realistic multi-ion coexistence condition  
 322 (PO<sub>4</sub><sup>3-</sup>, C<sub>2</sub>O<sub>4</sub><sup>2-</sup>, and S<sub>2</sub>O<sub>8</sub><sup>2-</sup> with 0.03 mol L<sup>-1</sup> Cl<sup>-</sup>), Co-OV/TiO<sub>2</sub>@TP still achieves 92% NO<sub>3</sub><sup>-</sup>-N  
 323 removal and 97% N<sub>2</sub> selectivity (Figure S28d). This can be possibly attributed to competitive  
 324 adsorption among the anions on the catalyst surface, which moderates the interference imposed  
 325 by any single species, confirming the strong anti-interference capability and practical  
 326 applicability of the proposed catalytic system.

327

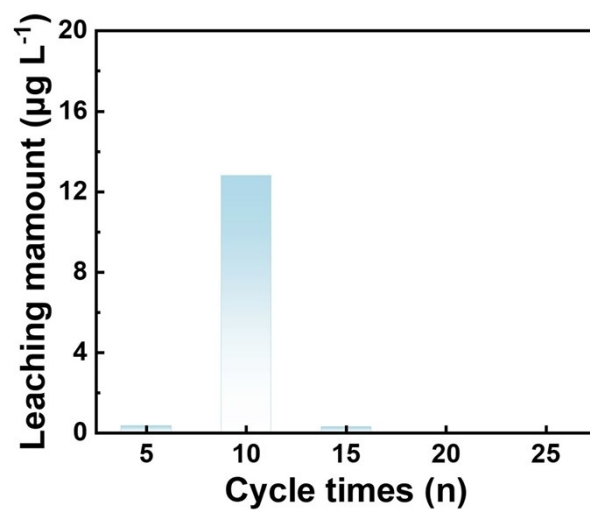

328

329 **Figure S29.** Co iron leaching amount of the Co-OV/TiO<sub>2</sub>@TP cathode during 26 repeated  
330 electrolysis tests (each test lasting 4 h).

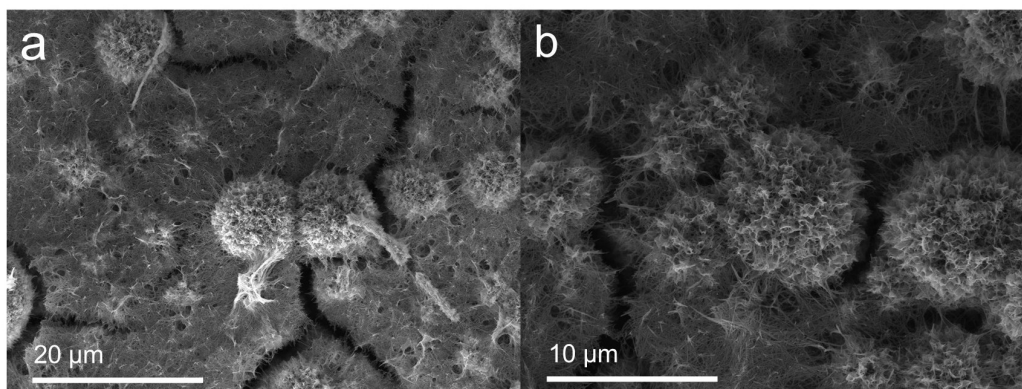

331

332 **Figure S30.** (a) SEM image of Co-OV/TiO<sub>2</sub>@TP before NO<sub>3</sub>RR, (b) SEM image of Co-  
333 OV/TiO<sub>2</sub>@TP after NO<sub>3</sub>RR.

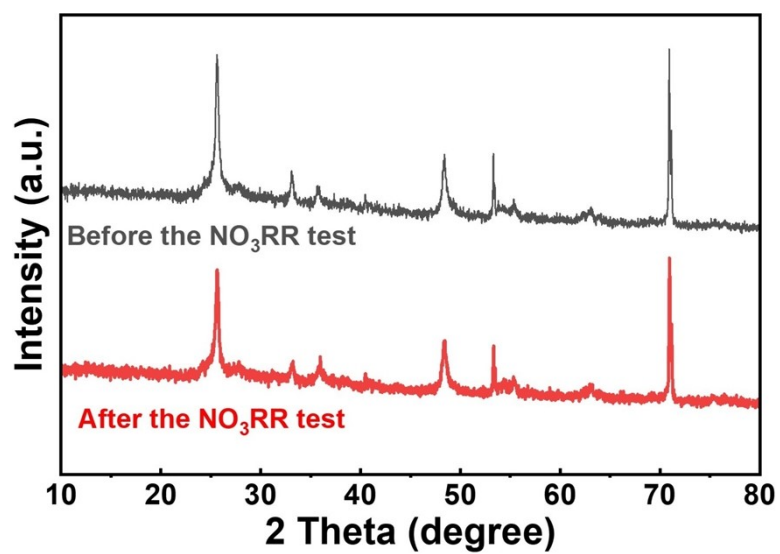

334

335 **Figure S31.** XRD patterns of Co-OV/TiO<sub>2</sub>@TP after NO<sub>3</sub>RR.

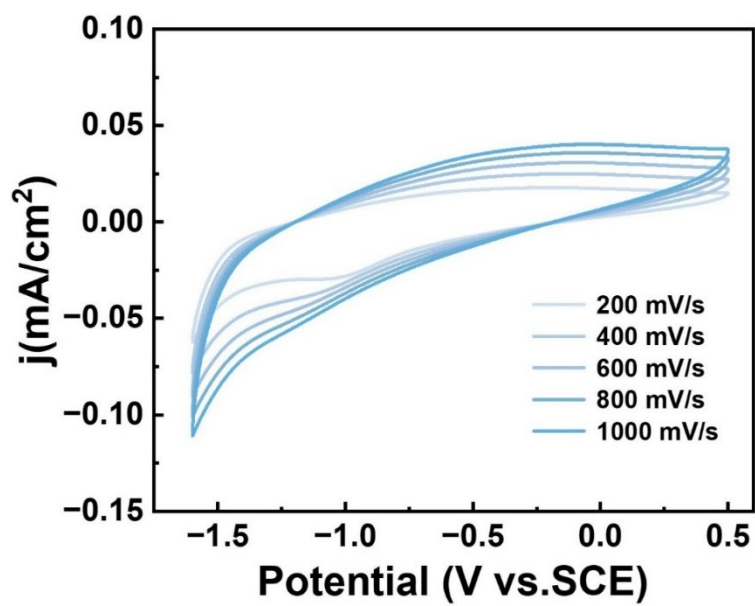

336

337 **Figure S32.** CV curves of NTO@TP with different scan rates.

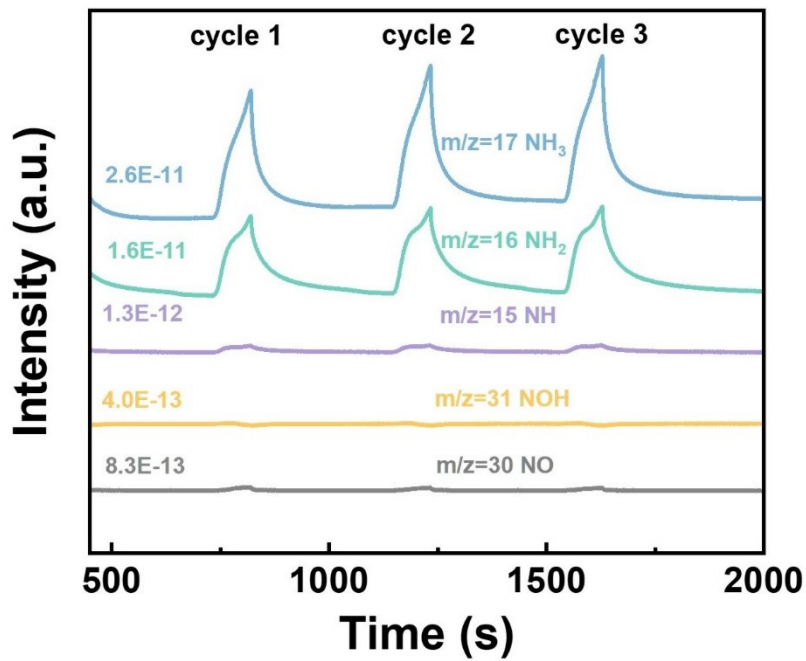

338

339 **Figure S33.** Electrochemical online DEMS results for the electrocatalytic NO<sub>3</sub>RR over  
 340 NTO@TP.

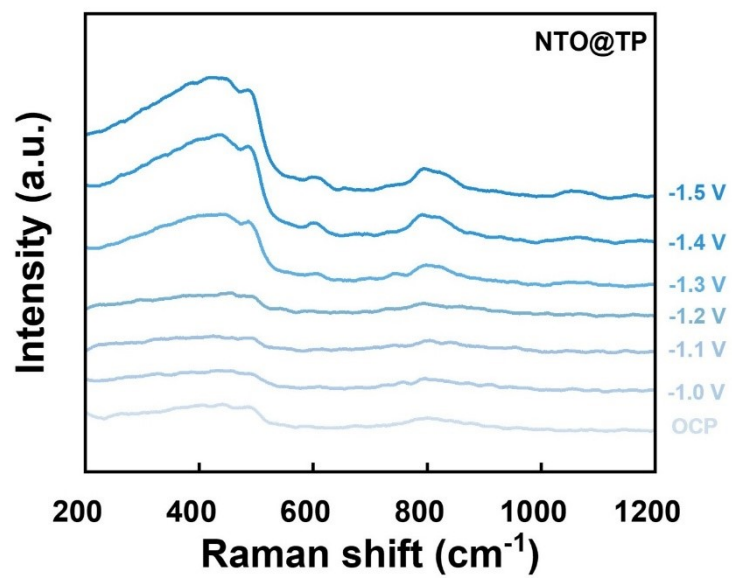

341

342 **Figure S34.** In situ Raman spectra of NTO@TP at different potentials.

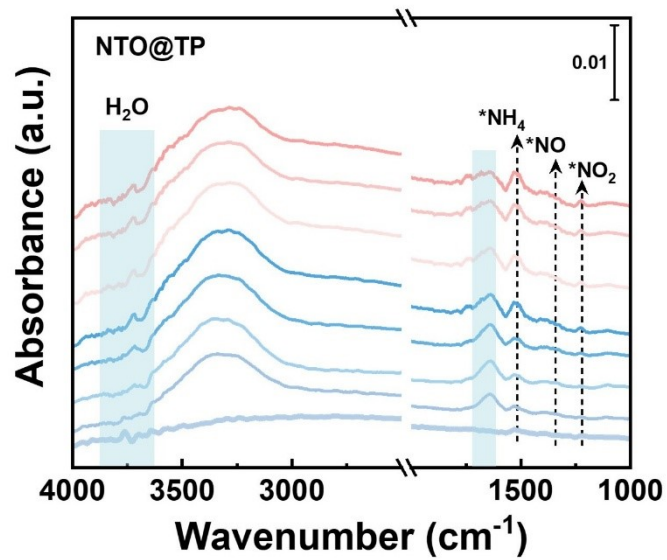

343

344 **Figure S35.** In situ electrochemical FT-IR spectra of NTO@TP at different potential.

345 **Table S1.** Comparison of NO<sub>3</sub>RR performances with reported catalysts.

| Catalysts                              | NO <sub>3</sub> <sup>-</sup> -N<br>(mg L <sup>-1</sup> ) | NO <sub>3</sub> <sup>-</sup> -N<br>Conversion<br>(%) | N <sub>2</sub><br>Selectivity<br>(%) | Reaction<br>conditions                                                                                          | Ref.             |
|----------------------------------------|----------------------------------------------------------|------------------------------------------------------|--------------------------------------|-----------------------------------------------------------------------------------------------------------------|------------------|
| Co-<br>OV/TiO <sub>2</sub> @TP         | 50                                                       | 98                                                   | 100                                  | PEC, visible<br>light, -1.5 V<br>(vs. SCE),<br>0.03 M Cl <sup>-</sup>                                           | <b>This work</b> |
| Cu <sub>2</sub> O/TiO <sub>2</sub> NFs | 100                                                      | 90.2                                                 | 98.7                                 | EC, -1.3 V<br>(vs. SCE), 0.1<br>M Na <sub>2</sub> SO <sub>4</sub> +<br>0.04 M Cl <sup>-</sup> ,<br>pH 7, 12 h   | (6)              |
| Ru <sub>1</sub> Ni SAA                 | 100                                                      | 93                                                   | 99                                   | EC, -1.4 V<br>(vs. SCE), Cl <sup>-</sup><br>:SO <sub>4</sub> <sup>2-</sup> = 1:1<br>(total 0.2 M),<br>pH 7, 9 h | (7)              |
| PdCu-P <sub>4</sub> /CS                | 100                                                      | 96.3                                                 | 95.2                                 | PEC, 300 W<br>xenon lamp<br>(λ > 400 nm),<br>-1.3 V (vs.<br>SCE), 2 h                                           | (8)              |
| Pd-Cu NCs-<br>NOMC                     | 100                                                      | 86                                                   | 60                                   | EC, -1.3 V<br>(vs. SCE), 0.1<br>M Na <sub>2</sub> SO <sub>4</sub><br>(neutral), 24 h                            | (9)              |

|                        |     |       |       |                                                                                                            |      |
|------------------------|-----|-------|-------|------------------------------------------------------------------------------------------------------------|------|
| R-P25@Ag/Cu<br>NPs     | 50  | 93    | 68    | PC, 300 W<br>Hg lamp, pH<br>3.5 (H <sub>2</sub> SO <sub>4</sub> ),<br>hole-<br>scavenger-<br>free, 180 min | (10) |
| ZnSe/BiVO <sub>4</sub> | 100 | 89.84 | 91.03 | PC, 500 W<br>Hg lamp (365<br>nm), HCOOH<br>(50 mmol/L),<br>pH 3.0, 50<br>min                               | (11) |

## 347 **References**

348 [1] G. Kresse, D. Joubert, From ultrasoft pseudopotentials to the projector augmented-wave  
349 method, *Physical Review B*, 59 (1999) 1758-1775.

350 [2] G. Kresse, J. Furthmüller, J. Efficient iterative schemes for ab initio total-energy  
351 calculations using a plane-wave basis set. *Physical Review B*, 54 (1996), 11169-11186.

352 [3] G. Kresse, J. Furthmüller, Efficiency of ab-initio total energy calculations for metals and  
353 semiconductors using a plane-wave basis set, *Computational Materials Science*, 6 (1996) 15-  
354 50.

355 [4] J.P. Perdew, K. Burke, M. Ernzerhof, Generalized Gradient Approximation Made Simple  
356 [*Phys. Rev. Lett.* 77, 3865 (1996)], *Physical Review Letters*, 78 (1997) 1396-1396.

357 [5] H.J. Monkhorst, J.D. Pack, Special points for Brillouin-zone integrations, *Physical Review*  
358 *B*, 13 (1976) 5188-5192.

359 [6] Y. Cong, X. Kang, Z. Wu, L. Gu, C. Wu, X. Duan, J. Chen, J. Yang, Self-Reconstruction  
360 Induced Electronic Metal-Support Interaction for Modulated Cu<sup>+</sup> Sites on TiO<sub>2</sub> Nanofibers in  
361 Electrocatalytic Nitrate Conversion, *Small*, 20 (2024) 2407554.

362 [7] Z. Wu, X. Kang, S. Wang, Y. Song, F. Xie, X. Duan, J. Yang, Co-Catalytic Metal-Support  
363 Interactions Design on Single-Atom Alloy for Boosted Electro-Reduction of Nitrate to  
364 Nitrogen, *Advanced Functional Materials*, 34 (2024) 2406917.

365 [8] J. Sun, H. Yang, W. Gao, T. Cao, G. Zhao, Diatomic Pd–Cu Metal-Phosphorus Sites for  
366 Complete N≡N Bond Formation in Photoelectrochemical Nitrate Reduction, *Angewandte*  
367 *Chemie International Edition*, 61 (2022) e202211373.

368 [9] H. Xu, H. Xu, Z. Chen, X. Ran, J. Fan, W. Luo, Z. Bian, W.X. Zhang, J. Yang, Bimetallic  
369 PdCu Nanocrystals Immobilized by Nitrogen-Containing Ordered Mesoporous Carbon for  
370 Electrocatalytic Denitrification, *ACS Appl Mater Interfaces*, 11 (2019) 3861-3868.

371 [10] C. Wang, S. Dong, Y. Wang, T. Guo, G. Gao, Z. Lu, B. Pan, Selective removal of nitrate

372 via the synergistic effect of oxygen vacancies and plasmon-induced hot carriers, Chemical  
373 Engineering Journal, 397 (2020) 125435.

374 [11] H. Shi, C. Li, L. Wang, W. Wang, J. Bian, X. Meng, Photocatalytic reduction of nitrate  
375 pollutants by novel Z-scheme ZnSe/BiVO<sub>4</sub> heterostructures with high N<sub>2</sub> selectivity, Separation  
376 and Purification Technology, 300 (2022) 121854.
